# Supplementary figures and images for: The identification of dual protective agents against cisplatin-induced oto- and nephrotoxicity using the zebrafish model
Source: eLife journal article supplement (doi:10.7554/elife.56235), 2020-07-28

**A** Ototoxicity

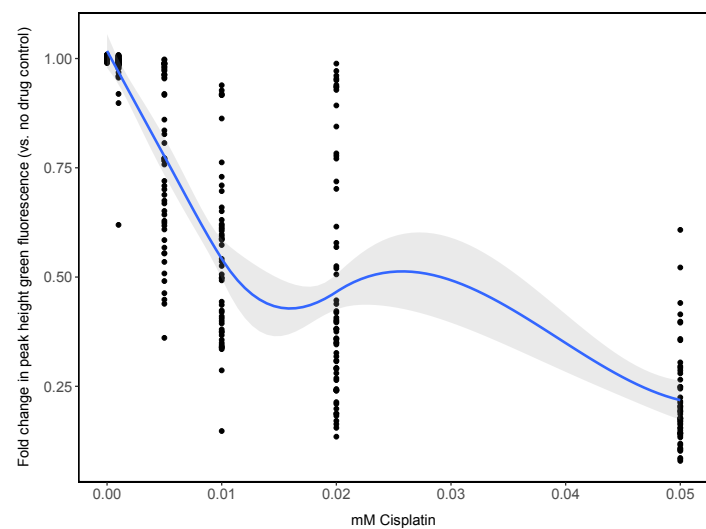

**B** Nephrotoxicity

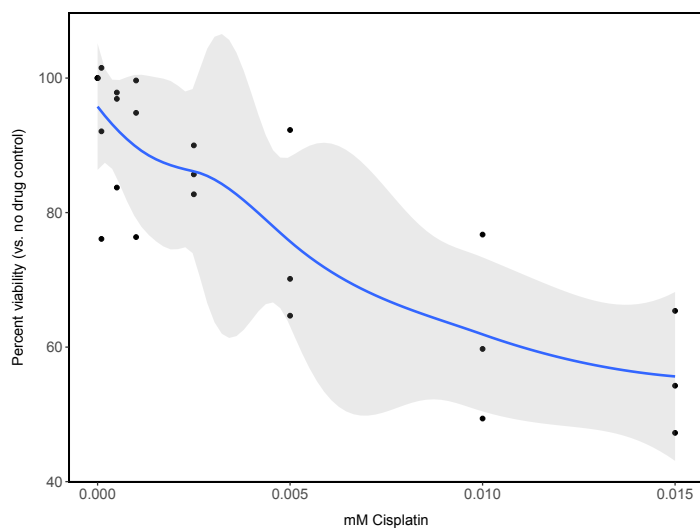

Supplement: supp [file elife-56235-supp-v1.zip]

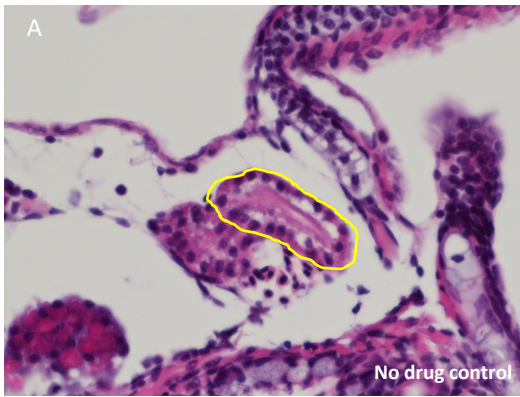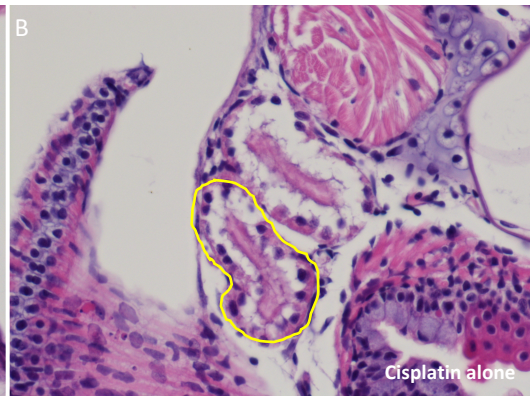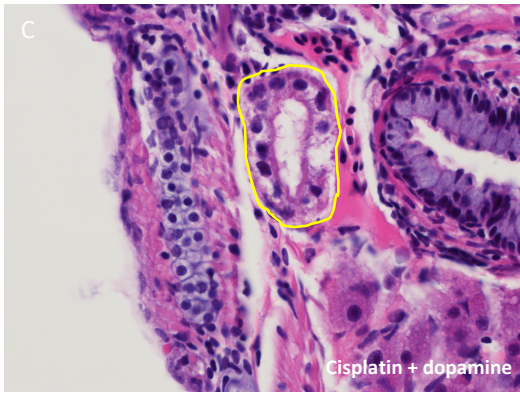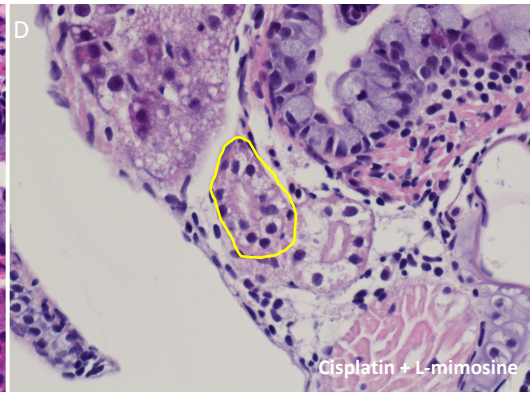

Supplement: supp [file elife-56235-supp-v1.zip]

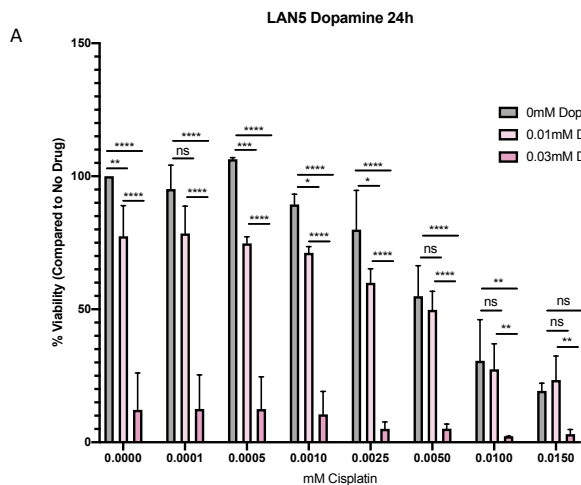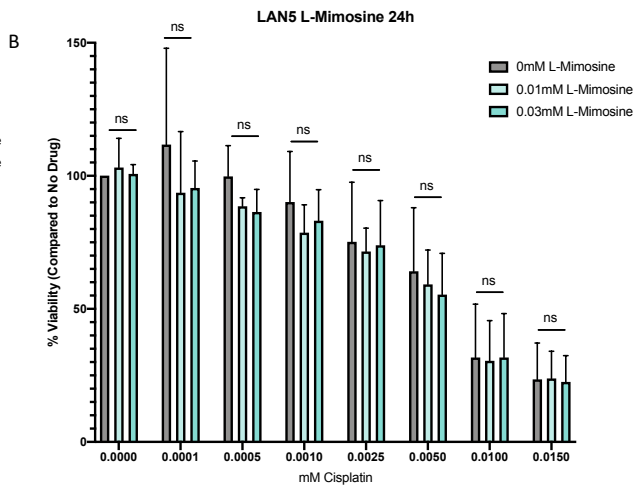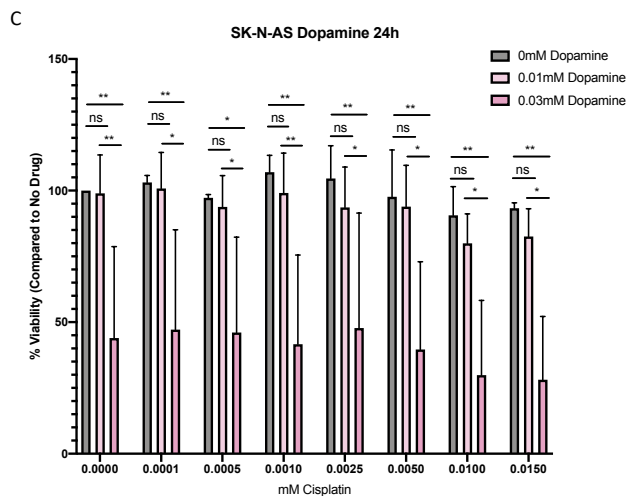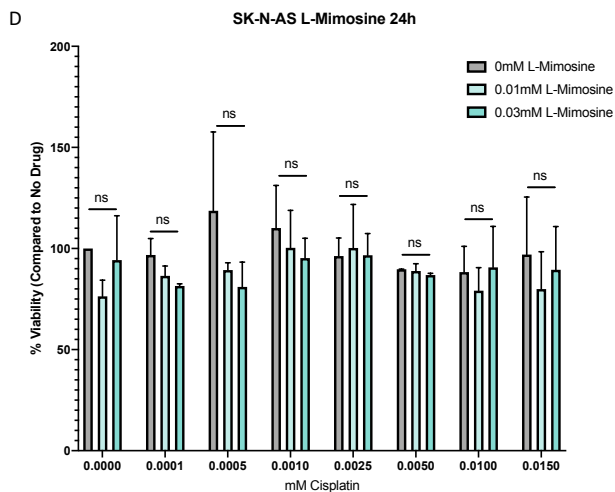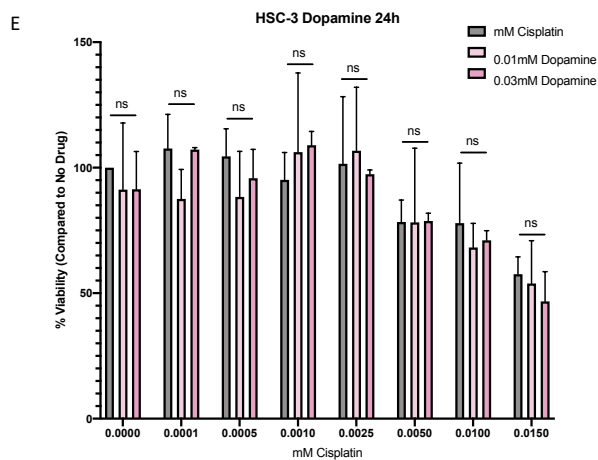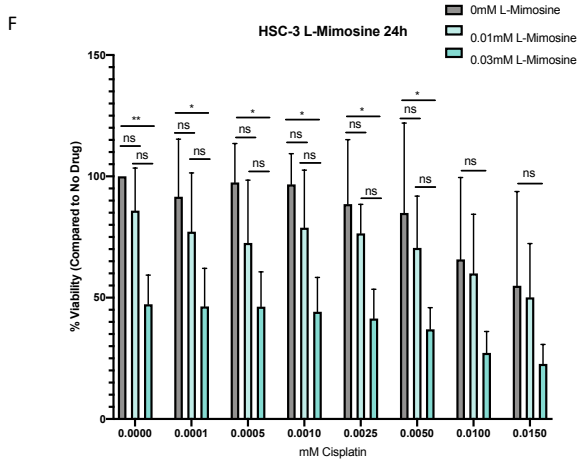

Supplement: supp [file elife-56235-supp-v1.zip]

A

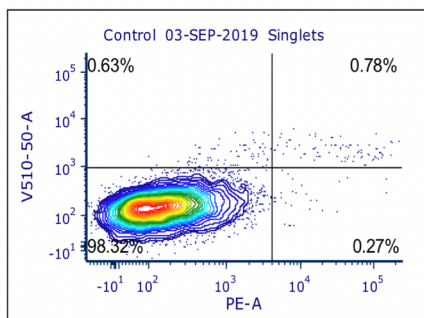

B

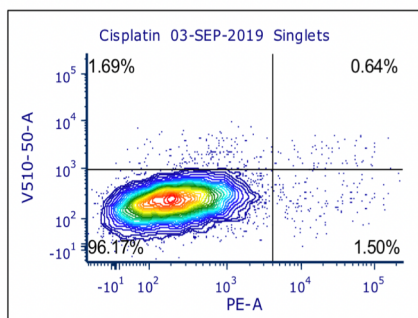

C

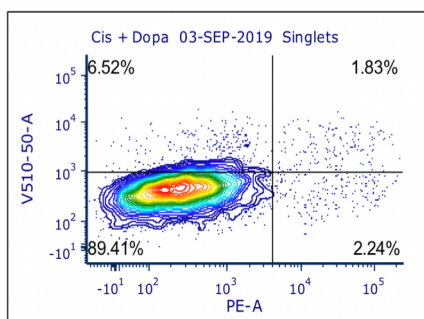

D

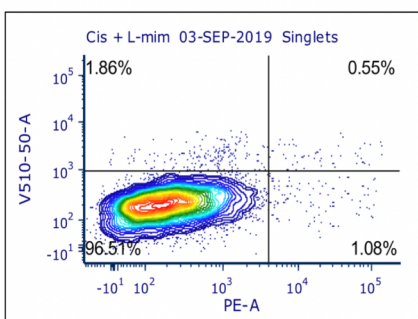

E

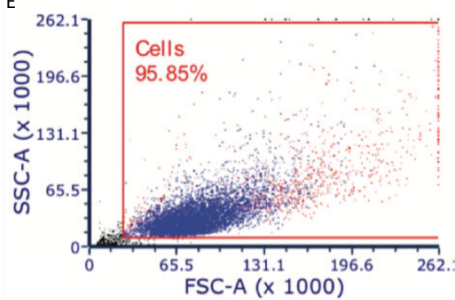

F

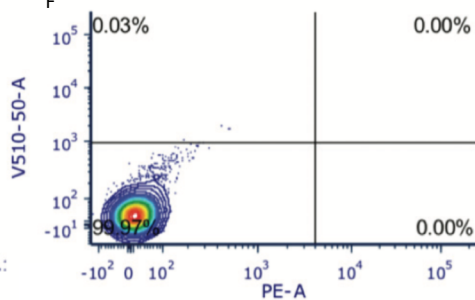

G

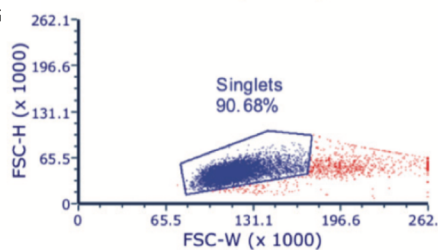

H

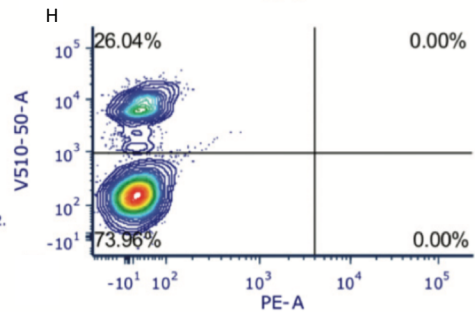

I

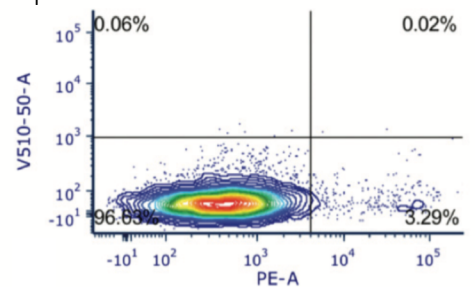

Supplement: supp [file elife-56235-supp-v1.zip]

A

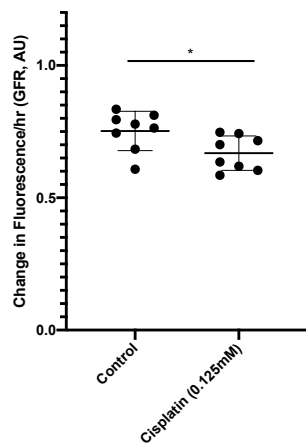

B

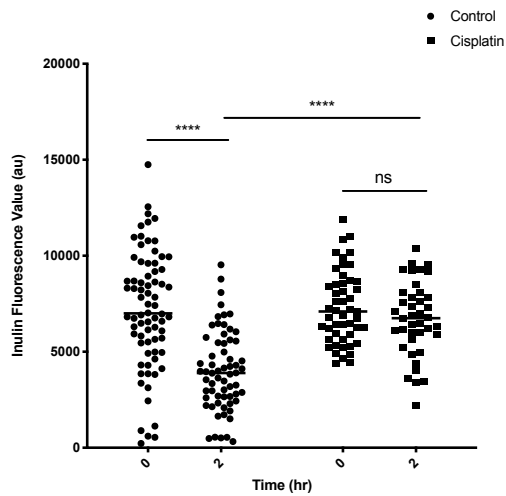

C

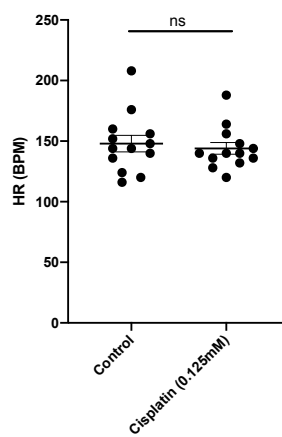

0 hr

2 hr

D

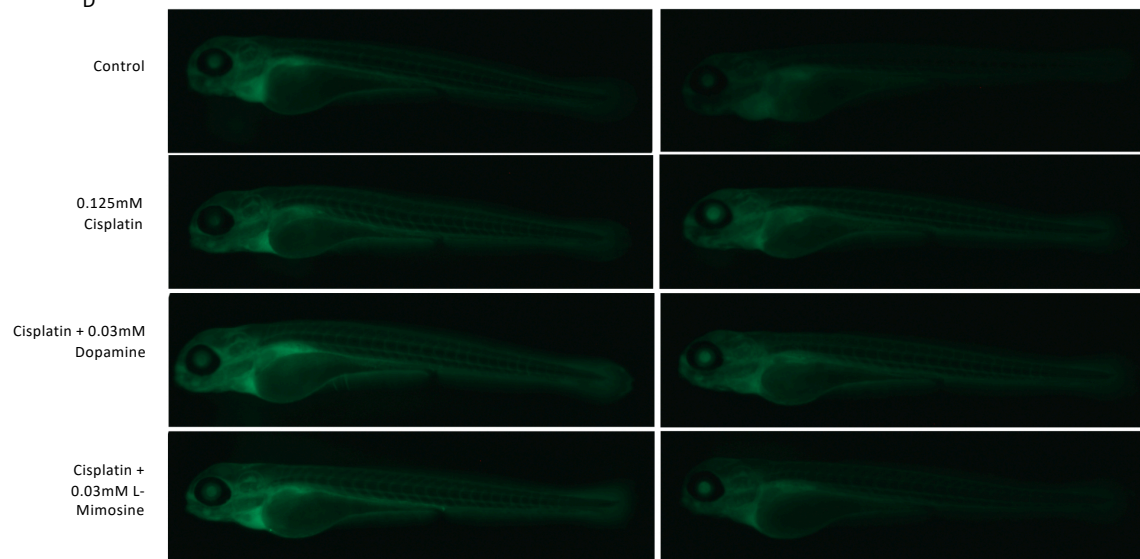

Supplement: supp [file elife-56235-supp-v1.zip]
